# Supplementary material
Source: publisher site journal article supplement (https://www.dovepress.com/get_supplementary_file.php?f=228931.docx)
Supplement: Supplementary file 1 [file get_supplementary_file.php]

**SUPPLEMENTARY MATERIAL**

**Table S1: Description of the Tai Chi exercise intervention**

| 1. Tai Chi classes |
| --- |
| Over the 20 weeks, participants progressed to learn 8 warm-ups (Baduanjin; raising the sky, gathering the heavens, cow looks at the moon, directing the ocean, shaolin archer, qi gong punching, separating heaven and earth, and shaking the earth) and 5 Tai Chi form patterns using old-frame Chen style (grand ultimate beginning, immortal pounds mortar, lazy to roll sleeves, six seals and four closes, and single whip). These were gradually introduced over the 20 weeks with each earlier warm-up and Tai Chi pattern repeated. The Tai Chi instructors kept a record of dyads’ weekly class attendance. |
| 2. Home-based Tai Chi practice |
| Between the second and fourth class, a Tai Chi instructor visited each dyad in their own home. Dyads were given a pack containing a colourful home exercise booklet and weekly homework sheets, to serve as a reminder of what had been covered in the classes each week and to prompt practice of Tai Chi at home. The carers were asked to facilitate the PWD to carry out Tai Chi for 20 minutes daily. |
| 3. Behaviour change |
| At the home visit, the Tai Chi instructor performed a risk assessment of the environment where Tai Chi was to be carried out. The Tai Chi instructor re-affirmed the benefits of doing Tai Chi and the central role of the home-based exercises to obtain these benefits.1 The instructor then facilitated the dyad to make joint action and coping plans.2-7 For action planning, dyads decided together when and where they would do their Tai Chi practice. For coping planning, the PWD and their carer anticipated any personal barriers that may arise for them whilst carrying out Tai Chi practice and what they could plan to do to overcome them. Other techniques already embedded within the design of the intervention included self-monitoring (dyads recorded their weekly completion of Tai Chi practice and handed this to the instructor at the next class), feedback on performance and adherence (from the instructor each week), and social support (from the instructor and peers in the class).8 Dyads were also provided a small branded alarm clock as a prompt to do their daily Tai Chi practice. If dyads did not attend a Tai Chi class for two consecutive weeks for an unknown reason, at the next scheduled weekly telephone call with the PWD, the researcher encouraged the dyad to continue attending. |

References

[1] National Institute for Health and Clinical Excellence. Behaviour change at population, community and individual levels (NICE public health guidance 6). London: National Institute for Health and Clinical Excellence, 2007.

[2] Michie S, Abraham C, Whittington C, McAteer J, Gupta S. Effective techniques in healthy eating and physical activity interventions: A meta-regression. *Health Psychology*. 2009;**28**: 690-701.

[3] Greaves CJ, Sheppard KE, Abraham C*, et al.* Systematic review of reviews of intervention components associated with increased effectiveness in dietary and physical activity interventions. *BMC Public Health*. 2011;**11**: e119.

[4] Chase J-A. Interventions to increase physical activity among older adults: A meta-analysis. *Gerontologist*. 2014;**Published Onilne October 7**: DOI: 10.1093/geront/gnu1090.

[5] Carver CS, Scheier MF. Control theory: A useful conceptual framework for personality-social, clinical, and health psychology. *Psychological Bulletin,*. 1982;**92**: 111-135.

[6] Schwarzer R. Modeling health behavior change: How to predict and modify the adoption and maintenance of health behaviors. *Applied Psychology: An International Review*. 2008;**57**: 1-29.

[7] Room J, Hannink E, Dawes H, Barker K. What interventions are used to improve exercise adherence in older people and what behavioural techniques are they based on? A systematic review. *BMJ Open*. 2017;**7**: e019221.

[8] National Institute for Health and Care Excellence. Behaviour change: Individual approaches. Manchester: National Institute for Health and Care Excellence, 2014

**Table S2: Baseline descriptive statistics for people with dementia**

|  | Usual care group (n=43) | Tai Chi group (n=42) |
| --- | --- | --- |
| Gender n (%)  Male  Female | 27 (63%)  16 (37%) | 24 (57%)  18 (43%) |
| Age mean (SD), range | 78.2 (7.5) 61.9-97.4 | 77.9 (8.3) 59.0-88.0 |
| Relationship status n (%)  Single  Married/civil partnership  With partner  Divorced/dissolved partnership  Widowed | -  36 (84%)  1 (2%)  -  6 (14%) | 2 (5%)  34 (81%)  -  2 (5%)  4 (10%) |
| Current living arrangements n (%)  Living alone  Living with family/ friends  Living in sheltered housing | 3 (7%)  40 (93%)  - | 4 (10%)  38 (90%)  - |
| Highest educational attainment n (%)  None  Primary school  Secondary school  University/ higher education  Further education/ professional qualification | 1 (2%)  -  25 (58%)  12 (28%)  5 (12%) | 2 (5%)  2 (5%)  21(50%)  12 (29%)  5 (12%) |
| Ethnicity n (%)  White  Asian  Black | 41 (95%)  1 (2%)  1 (2%) | 42 (100%)  -  - |
| Type of dementia n (%)  Alzheimer’s  Vascular  Alzheimer’s and vascular  Other | 26 (60%)  5 (12%)  6 (14%)  6 (14%) | 30 (71%)  1 (2%)  9 (21%)  2 (5%) |
| Time since diagnosis (years) median (IQR) | 1.39 (2.62) 0.10-7.54 | 1.13 (2.45) 0.20-7.72 |
| Other long term conditions (see below)*  n (%)  No  One  Two  Three or more | 19 (44%)  13 (30%)  8 (19%)  3 (7%) | 20 (48%)  14 (33%)  6 (14%)  2 (5%) |
| Uses a walking aid n (%)  No  Yes | 31 (72%)  12 (28%) | 29 (69%)  13 (31%) |
| Number of medications currently taken n (%)  0  1  2  3+  missing | 2 (5%)  4 (10%)  6 (14%)  30 (71%)  1 | -  5 (12%)  3 (7%)  34 (81%) |
| Falls in past 12 months n (%)  None  Yes, no injury  Yes, minor injury  Yes, moderate injury  Yes, severe injury | 25 (58%)  7 (16%)  6 (14%)  4 (9%)  1 (2%) | 23 (55%)  7 (17%)  6 (14%)  3 (7%)  3 (7%) |
| Falls in past month n (%)  None  Yes, no injury  Yes, minor injury  Yes, moderate injury  Yes, severe injury | 39 (91%)  2 (5%)  2 (5%)  -  - | 36 (86%)  -  6 (14%)  -  - |
| Current level of moderate physical activity n (%)  Every day  3 times per week  2 times per week  Weekly  Monthly  Rarely/ never | 9 (21%)  4 (9%)  4 (9%)  4 (9%)  -  22 (51%) | 15 (36%)  7 (17%)  3 (7%)  2 (5%)  2 (5%)  13 (31%) |
| Current level of vigorous physical activity n (%)  Every day  2 times per week  3 times per week  Weekly  Monthly  Rarely/ never | -  -  -  1 (2%)  1 (2%)  41 (95%) | 1 (2%)  -  -  2 (5%)  1 (2%)  38 (90%) |
| Recruitment site n (%)  National Health Service 1  National Health Service 2  National Health Service 3 | 11 (26%)  30 (70%)  2 (5%) | 10 (24%)  30 (71%)  2 (5%) |
| *Long term health conditions at baseline (ranked by most frequent and including only those affecting 3 or more participants) | | | |
| Musculoskeletal n (%) | 9 (21%) | 5 (12%) | |
| Cardiovascular n (%) | 6 (14%) | 7 (17%) | |
| Respiratory problems n (%) | 3 (7%) | 6 (14%) | |
| Diabetes n (%) | 5 (12%) | 4 (10%) | |
| Blood pressure n (%) | 3 (7%) | 6 (14%) | |
| Renal tract n (%) | 5 (12%) | 1 (2%) | |

**Table S3: Baseline descriptive statistics for informal carers**

|  | Usual care group (n=43) | Tai Chi group (n=42) |
| --- | --- | --- |
| **Gender n (%)**  Male  Female | 8 (19%)  35 (81%) | 10 (24%)  32 (76%) |
| **Age mean (SD) range** | 70.8 (10.4) 47.5-88.8 | 72.0 (9.9) 43.4-87.9 |
| **Relationship to PWD n (%)**  Spouse/ partner  Son/ daughter  Brother/ sisterhood  Friend  Other | 33 (77%)  5 (12%)  2 (5%)  2 (5%)  1 (2%) | 34 (81%)  3 (7%)  4 (10%)  -  1 (2%) |
| **Living with PWD n (%)**  Yes  No | 38 (88%)  5 (12%) | 36 (86%)  6 (14%) |
| **Relationship status n (%)**  Single  Married/civil partnership  With partner  Divorced/dissolved partnership  Widowed | 2 (5%)  37 (86%)  2 (5%)  2 (5%)  - | 2 (5%)  36 (86%)  1 (2%)  2 (5%)  1 (2%) |
| **Current living arrangements n (%)**  Living alone  Living with family/ friends | 1 (2%)  42 (98%) | 2 (5%)  40 (95%) |
| **Highest educational attainment n (%)**  None  Primary school  Secondary school  University/ higher education  Further education/ professional qualification | 2 (5%)  1 (2%)  19 (44%)  14 (33%)  7 (16%) | -  2 (5%)  22 (52%)  15 (36%)  3 (7%) |
| **Ethnicity n (%)**  White  Asian | 42 (98%)  1 (2%) | 42 (100%)  - |

**Table S4: Adverse and serious adverse events**

| Number of serious adverse events related to Tai Chi classes (Tai Chi arm only)  PWD  Carer | 0  0 |
| --- | --- |
| Number of serious adverse events related to Tai Chi home exercises (Tai Chi arm only)  PWD  Carer | 0  0 |
| Number of serious adverse events related to balance tests (both arms combined)  PWD  Carer | 0  0 |
| Other unrelated serious adverse events   1. Overall   PWD  Carer   1. Tai Chi arm   PWD  Carer   1. Control arm   PWD  Carer | 9 in 7 people  3 in 3 people  5 in 4 people  3 in 3 people  4 in 3 people  0 |
| Number of adverse events related to Tai Chi classes (Tai Chi arm only)  PWD  Carer | 1 AE in 1 person (possibly related)  1 AE in 1 person (possibly related) |
| Number of adverse events related to Tai Chi home exercises (Tai Chi arm only)  PWD  Carer | 1 AE in 1 person (probably related)  0 |
| Number of adverse events related to balance tests (both arms combined)  PWD  Carer | 0  0 |
| Other unrelated adverse events   1. Overall   PWD  Carer   1. Tai Chi arm   PWD  Carer   1. Control arm   PWD  Carer | 3 AE in 3 people  2 AE in 2 people  3 AE in 3 people  2 AE in 2 people  0  0 |
| Changes in any health factors over the course of the trial that might influence primary outcome measure at follow-up (medication, walking aid, anxiety/depression, dementia symptoms, emergency department admission, hospital inpatient, elective surgery, major life event, other health change) n (%)  PWD   1. Tai Chi arm only 2. Control arm only   Carer   1. Tai Chi arm only 2. Control arm only | 25/36 (69%)  27/36 (75%)  31/36 (86%)  28/36 (78%) |

**Table S5: Willingness to pay for Tai Chi**

|  | **Overall** | **Tai Chi group** | **Control group** |
| --- | --- | --- | --- |
| Willing to pay for Tai Chi classes for 5 months  Yes n (%)  Median (IQR) amount willing to pay (£) | 54% (38/70)  15 missing  5.00 (4.50)  2.50-15.00, n=37  mean 5.58; SD 2.85  1 missing | 46% (16/35)  7 missing  5.00 (4.75)  2.50-12.00, n=16  mean 5.28; SD 2.66 | 63% (22/35)  8 missing  5.00 (4.50)  3.00-15.00, n=21  mean 5.81; SD 3.03  1 missing |
| Willing to pay for own transport costs  Yes n (%) | 59% (41/69)  16 missing | 53% (18/34)  8 missing | 66% (23/35)  8 missing |
| Willing to pay for Tai Chi instructor home visit  Yes n (%)  Median (IQR) amount willing to pay (£) | 42% (30/72)  13 missing  10.00 (8.00)  5.00-25.00, n=29  mean 12.36; SD 5.70  1 missing | 33% (12/36)  6 missing  10.00 (3.00)  6.00-20.00, n=11  mean 11.23; SD 3.62  1 missing | 50% (18/36)  7 missing  12.50(15.00)  5.00-25.00, n=18  mean 13.06; SD 6.67 |
| Willing to pay for Tai Chi classes for 5 months if reduced falls by 20%  Yes n (%)  Median (IQR) amount willing to pay (£) | 63% (45/72)  13 missing  5.00 (4.00)  1.00-12.00, n=43  mean 5.84; SD 2.52  2 missing | 56% (20/36)  6 missing  5.00 (4.50)  1.00-12.00, n=20  mean 5.45; SD 2.67 | 69% (25/36)  7 missing  5.00 (3.00)  3.00-10.00, n = 23  mean 6.17; SD 2.39  2 missing |
| Willing to pay for own transport costs if reduced falls by 20%  Yes n (%) | 67% (48/72)  13 missing | 58% (21/36)  6 missing | 75% (27/36)  7 missing |
| Willing to pay for Tai Chi instructor home visit if reduced falls by 20%  Yes n (%)  Median (IQR) amount willing to pay (£) | 54% (38/70)  15 missing  5.00 (4.50)  2.50-15.00, n=37  mean 5.58; SD 2.85  1 missing | 46% (16/35)  7 missing  5.00 (4.75)  2.50-12.00, n=16  mean 5.28; SD 2.66 | 63% (22/35)  8 missing  5.00 (4.50)  3.00-15.00, n=21  mean 5.81; SD 3.03  1 missing |


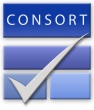
CONSORT 2010 checklist of information to include when reporting a randomised trial*

| Section/Topic | Item No | Checklist item | Reported on page No |
| --- | --- | --- | --- |
| Title and abstract | | | |
|  | 1a | Identification as a randomised trial in the title | Title page |
| 1b | Structured summary of trial design, methods, results, and conclusions (for specific guidance see CONSORT for abstracts) | 1 |
| Introduction | | | |
| Background and objectives | 2a | Scientific background and explanation of rationale | 2 |
| 2b | Specific objectives or hypotheses | 2-3 |
| Methods | | | |
| Trial design | 3a | Description of trial design (such as parallel, factorial) including allocation ratio | 4 |
| 3b | Important changes to methods after trial commencement (such as eligibility criteria), with reasons | 4 |
| Participants | 4a | Eligibility criteria for participants | 4-5 |
| 4b | Settings and locations where the data were collected | 4-5 |
| Interventions | 5 | The interventions for each group with sufficient details to allow replication, including how and when they were actually administered | 5-6, Table S1 |
| Outcomes | 6a | Completely defined pre-specified primary and secondary outcome measures, including how and when they were assessed | 6-8 |
| 6b | Any changes to trial outcomes after the trial commenced, with reasons | n/a |
| Sample size | 7a | How sample size was determined | 8 |
| 7b | When applicable, explanation of any interim analyses and stopping guidelines | n/a |
| Randomisation: |  |  |  |
| Sequence generation | 8a | Method used to generate the random allocation sequence | 4 |
| 8b | Type of randomisation; details of any restriction (such as blocking and block size) | 4 |
| Allocation concealment mechanism | 9 | Mechanism used to implement the random allocation sequence (such as sequentially numbered containers), describing any steps taken to conceal the sequence until interventions were assigned | 4 |
| Implementation | 10 | Who generated the random allocation sequence, who enrolled participants, and who assigned participants to interventions | 4 |
| Blinding | 11a | If done, who was blinded after assignment to interventions (for example, participants, care providers, those assessing outcomes) and how | 6-7 |
| 11b | If relevant, description of the similarity of interventions | n/a |
| Statistical methods | 12a | Statistical methods used to compare groups for primary and secondary outcomes | 9 |
| 12b | Methods for additional analyses, such as subgroup analyses and adjusted analyses | 9 |
| Results | | | |
| Participant flow (a diagram is strongly recommended) | 13a | For each group, the numbers of participants who were randomly assigned, received intended treatment, and were analysed for the primary outcome | Figures 1 and S1 |
| 13b | For each group, losses and exclusions after randomisation, together with reasons | Figures 1 and S1 |
| Recruitment | 14a | Dates defining the periods of recruitment and follow-up | 10 |
| 14b | Why the trial ended or was stopped | n/a |
| Baseline data | 15 | A table showing baseline demographic and clinical characteristics for each group | Tables 1, S2 and S3 |
| Numbers analysed | 16 | For each group, number of participants (denominator) included in each analysis and whether the analysis was by original assigned groups | Tables 2 and 3 |
| Outcomes and estimation | 17a | For each primary and secondary outcome, results for each group, and the estimated effect size and its precision (such as 95% confidence interval) | Tables 2 and 3 |
| 17b | For binary outcomes, presentation of both absolute and relative effect sizes is recommended | Table 3 |
| Ancillary analyses | 18 | Results of any other analyses performed, including subgroup analyses and adjusted analyses, distinguishing pre-specified from exploratory | 11-12 |
| Harms | 19 | All important harms or unintended effects in each group (for specific guidance see CONSORT for harms) | 11 |
| Discussion | | | |
| Limitations | 20 | Trial limitations, addressing sources of potential bias, imprecision, and, if relevant, multiplicity of analyses | 16-17 |
| Generalisability | 21 | Generalisability (external validity, applicability) of the trial findings | 16 |
| Interpretation | 22 | Interpretation consistent with results, balancing benefits and harms, and considering other relevant evidence | 13-16 |
| Other information | | |  |
| Registration | 23 | Registration number and name of trial registry | 1 |
| Protocol | 24 | Where the full trial protocol can be accessed, if available | 4 |
| Funding | 25 | Sources of funding and other support (such as supply of drugs), role of funders | 20-22 |

*We strongly recommend reading this statement in conjunction with the CONSORT 2010 Explanation and Elaboration for important clarifications on all the items. If relevant, we also recommend reading CONSORT extensions for cluster randomised trials, non-inferiority and equivalence trials, non-pharmacological treatments, herbal interventions, and pragmatic trials. Additional extensions are forthcoming: for those and for up to date references relevant to this checklist, see [www.consort-statement.org](http://www.consort-statement.org).

Figure S1: CONSORT flow diagram in full

|  |  | **Referred to research team (n=359)** | | | | | | |  |
| --- | --- | --- | --- | --- | --- | --- | --- | --- | --- |
|  |  | |  | |  |  |  | | |
|  |  | |  | |  |  | **Could not be contacted for assessment of initial eligibility (n=45)** | | |
|  |  | |  | |  |  |
|  |  | |  | |  |  |  | | |
|  |  | **Assessed for initial eligibility (n=314)** | | | | | | |  |
|  |  | |  | |  |  |  | | |
|  |  | |  | |  |  | **Declined (n=121)**  **"**Not our thing", “not for us at the moment” **n=33**  Lack of time, not wanting to be tied/commit **n=17**  PWD is in ill health **n=14**  Not interested / No further reason provided **n=11**  Carer does not see PWD doing Tai Chi **n=6**  Currently attend exercise class (incl. Tai Chi) **n=6**  Currently taking part in another trial **n=5**  Do not think this exercise helpful/appropriate **n=5**  PWD refused home visit/ assessments **n=5**  PWD unwilling to perform physical exercise **n=4**  Unwilling to take part/risk the control group **n=4**  PWD lost confidence/avoids socialization **n=3**  Carer cannot check PWD happy to participate **n=2**  Not willing to travel to the closest venue **n=2**  PWD is asleep a good part of the day **n=2**  Carer unaware consent to contact sent to researcher **n=1**  In process of moving home **n=1**  **Ineligible at screening (n=96)**  No carer available for study **n=30**  Unable to travel to the closest class regularly **n=14**  Unable to attend class on the day/time **n=20**  No confirmed diagnosis of dementia **n=7**  Cannot do standing Tai Chi (incl. wheelchair- bound) **n=6**  PWD has Parkinson's / Lewy Body disease **n=5**  Living in a care home (permanent care) **n=3**  Severe dementia symptoms **n=4**  Severe sensory impairment **n=4**  PWD lacks capacity to give informed consent **n=2**  PWD aged under 65 **n=1** | | |
|  | |  |  |
|  | | |  | | |  |  | |  |
|  |  | **Initially eligible & willing (n=97)** | | | | | | |  |
|  |  | |  | |  |  |  | | |
|  |  | |  | |  |  | **Ineligible at home visit (n=11)**  M-ACE <10 **n=8**  PWD not willing to take part at home-visit **n=2**  Lack mental capacity to consent **n=1** | | |
|  | |  |  |
|  | | |  | | |  | | |  |
|  |  | **Recruited (n=86)**  **(i.e. eligible, consented, provided baseline data)** | | | | | | |  |
|  |  | |  | |  |  |  | | |
|  |  | |  | |  |  | **Dyad withdrawn prior to randomisation (n=1)**  No other dyads recruited to the class cohort **n=1** | | |
|  |  | |  | |  |  |
|  |  | |  |  | |  |  |  | |
|  | | **Randomised (n=85)** | | | | | | |  |

|  | |  | | | | |  | | |  | | |  | | | |  | |
| --- | --- | --- | --- | --- | --- | --- | --- | --- | --- | --- | --- | --- | --- | --- | --- | --- | --- | --- |
|  | |  | |  | | |  | |  | | | |  | | |  |  | |
|  | | **Tai Chi group (n=42)** | | | | |  | | | | |  | **Usual care group (n=43)** | | | |  | |
|  | |  | | | |  |  | | | |  | | |  | | | | |
| **Early discontinuation of intervention (n=5)**   - Carer clash with other commitment thus PWD withdrew **n=1** - Carer found study burdensome thus PWD withdrew **n=1** - Carer has other health problem, thus PWD withdrew **n=1** - PWD & carer are not enjoying Tai Chi **n=1** - PWD & carer have worsening physical health **n=1** | | | | |  |  | | | | | | | |  |  | | | |
|  |  |
|  | |  |  | | |  | | | | | | | |  |  | | | |
| **Lost to follow-up - dyads (n=6)**   - PWD & carer no longer interested in study **n=1** - PWD no longer interested in study thus carer withdrew **n=1** - PWD & carer have worsening physical health **n=1** - PWD has worsening physical health thus carer withdrew **n=1** - Clash with other joint commitment thus both withdrew **n=1** - PWD did not wish to continue (reason not given) thus carer withdrew **n=1** | | | | |  |  | | | | | | | |  | **Lost to follow-up - dyads (n=7)**   - PWD & carer no longer interested in study **n=5** - PWD has worsening physical health thus carer withdrew **n=1** - PWD died thus carer withdrew n=1   **Lost to follow-up – PWD only (n=1)**   - PWD moved to a care home, carer provided follow-up data | | | |
|  |  |
|  |  |  | | | |
|  |  | | | | |  | |  |  | | | | |  |  | |  | |
|  | **Analysed with primary outcome**  **(n=36)** | | | | | | |  | **Analysed with primary outcome 1,2**  **(n=35)** | | | | | | | | |  |
|  |  | | | | | | |  | 1. *Includes 1 dyad where PWD provided data but not TUG/measures that involved standing.* 2. *Excludes 1 dyad where Carer provided primary outcome but PWD did not.* | | | | | | | | |  |
